# Supplementary figures and images for: Prolonged T-cell activation and long COVID symptoms independently associate with severe COVID-19 at 3 months
Source: eLife journal article supplement (doi:10.7554/elife.85009), 2023-06-13

**Figure 1 - figure supplement 1**

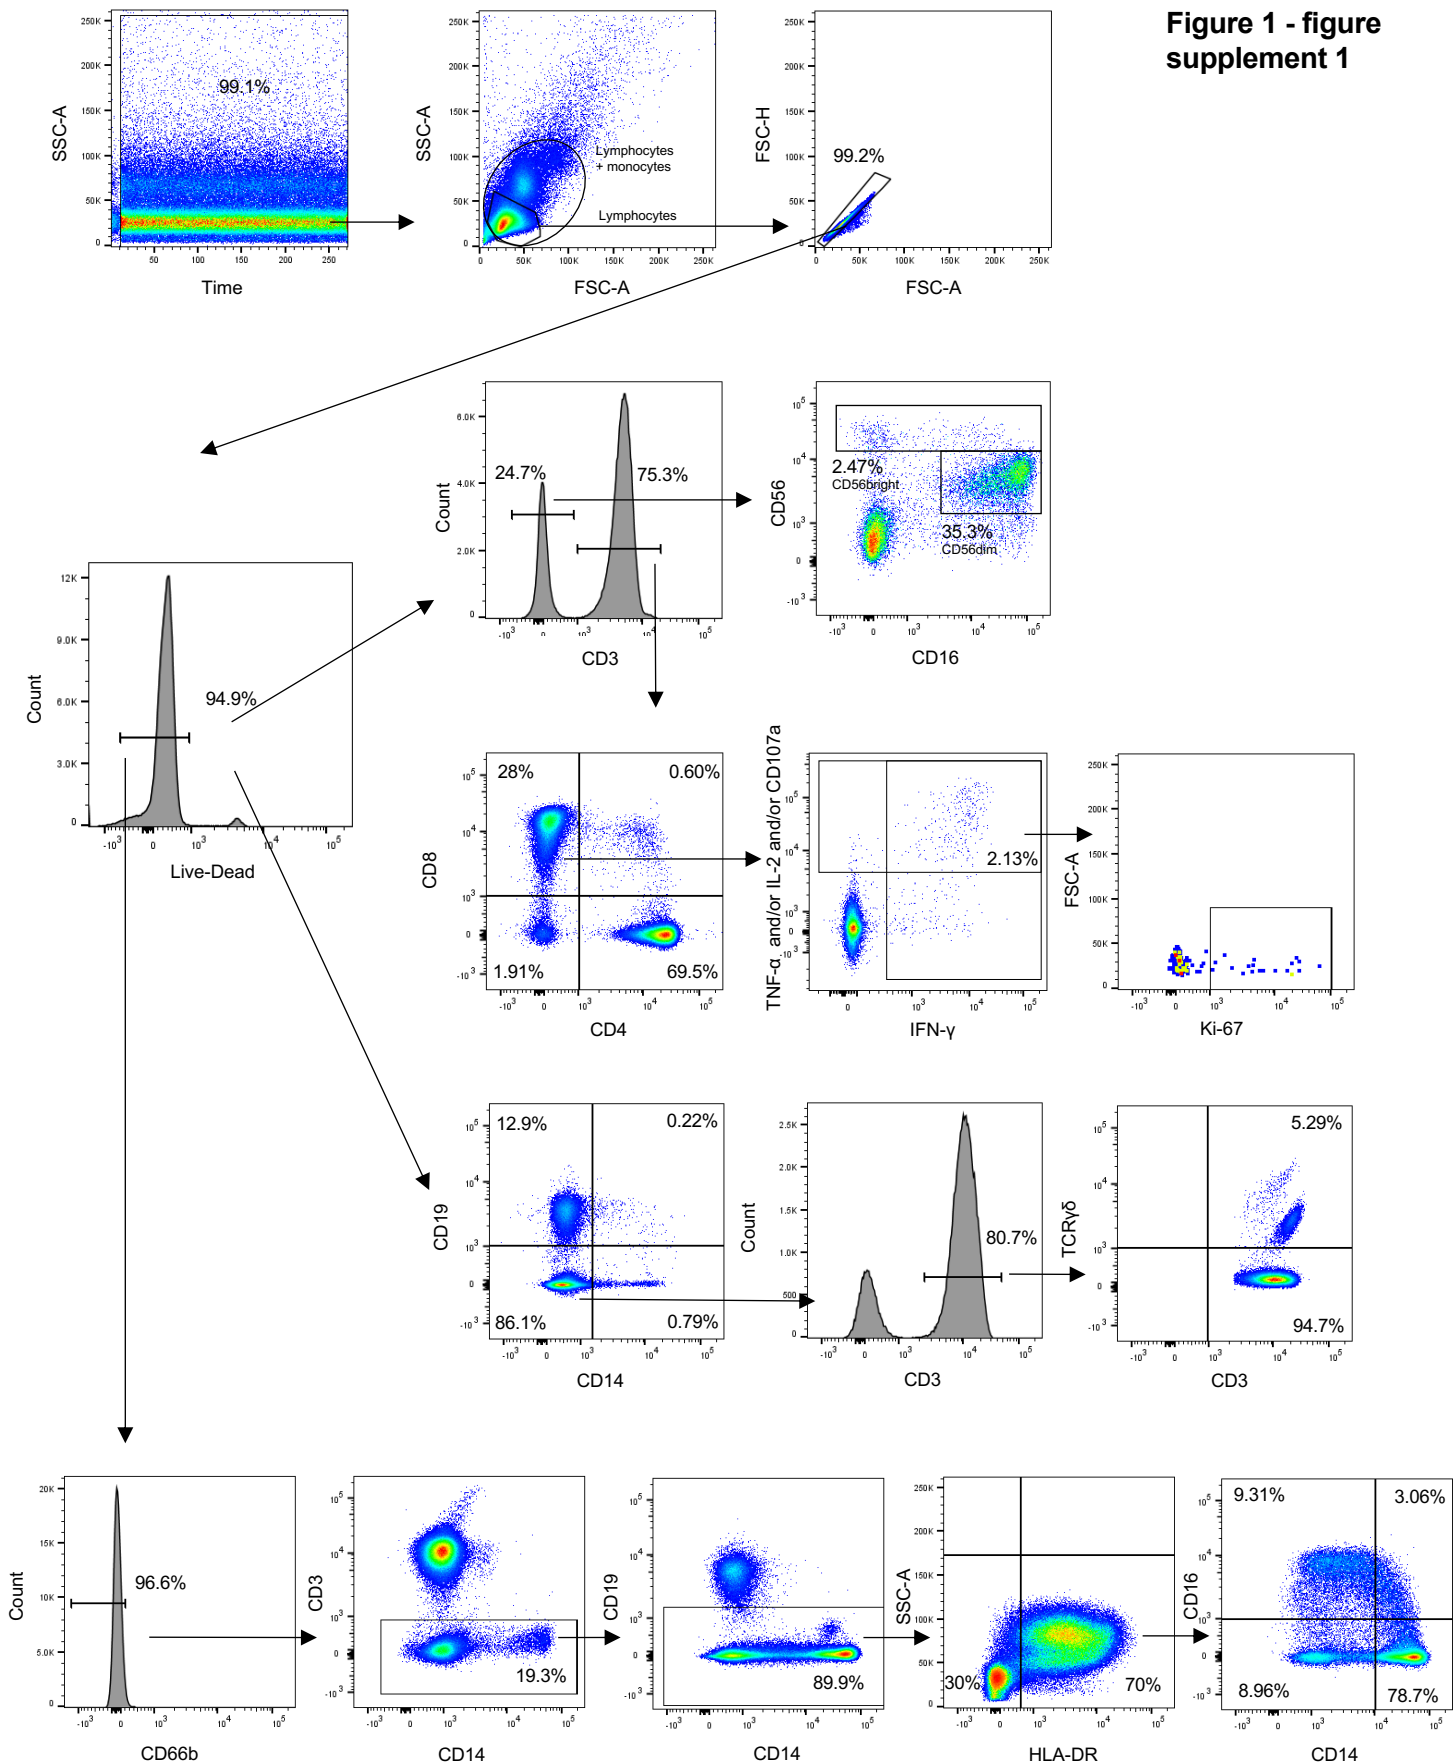

Supplement: supp [file elife_poa_e85009_Figure_1_figure_supplement_1.pdf › elife_poa_e85009_Figure_1_figure_supplement_1.pdf]

Figure 1- figure supplement 2

○ Mild    ● Moderate    ● Severe

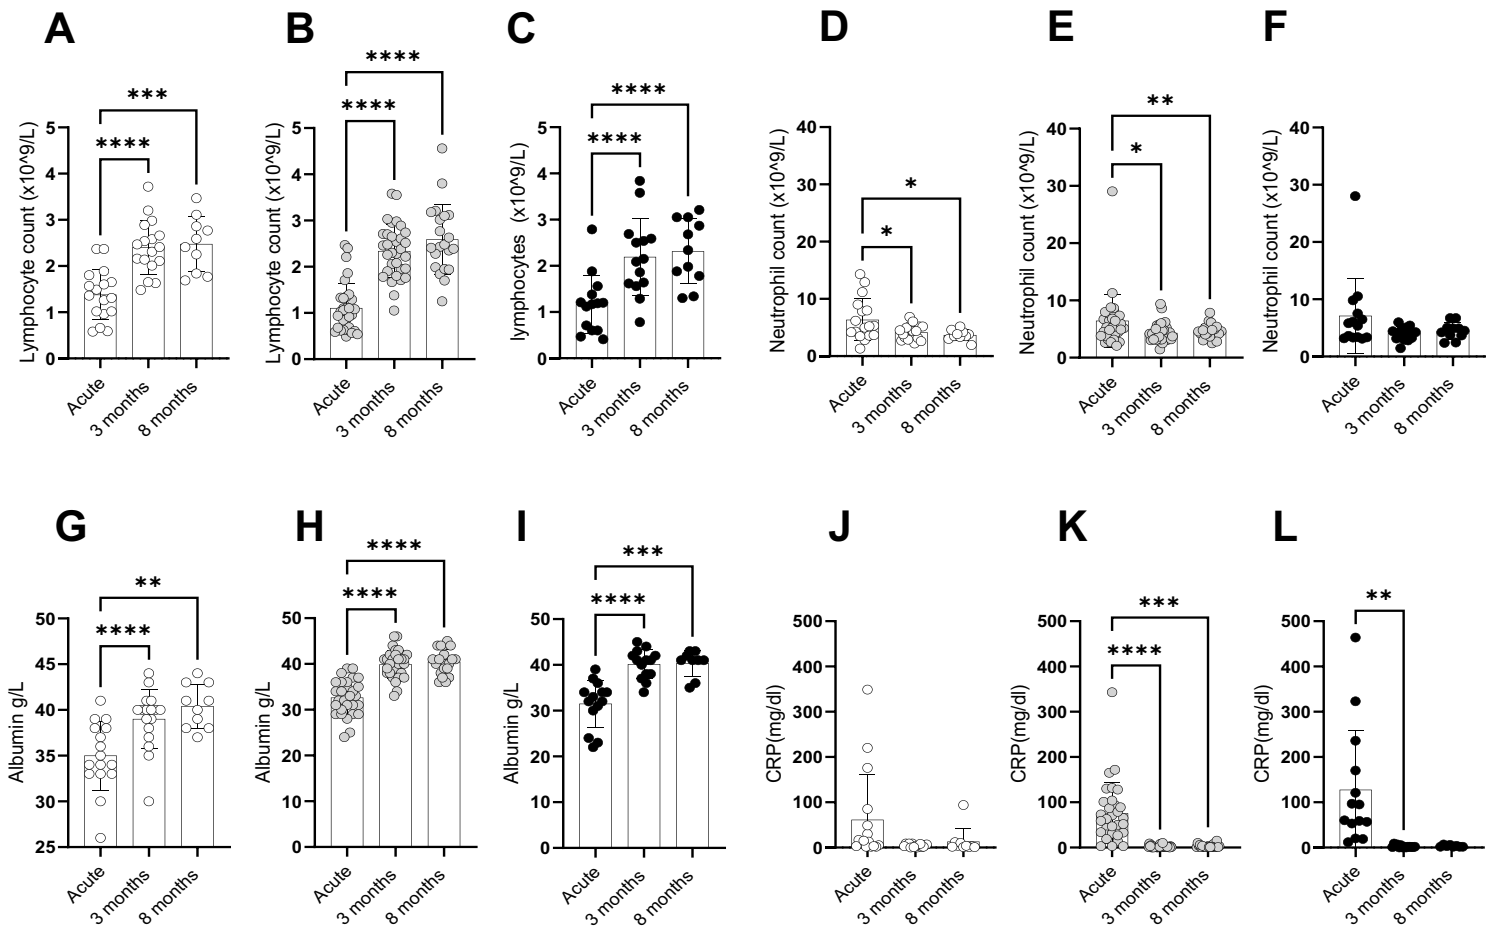

Supplement: supp [file elife_poa_e85009_Figure_1_figure_supplement_2.pdf › elife_poa_e85009_Figure_1_figure_supplement_2.pdf]

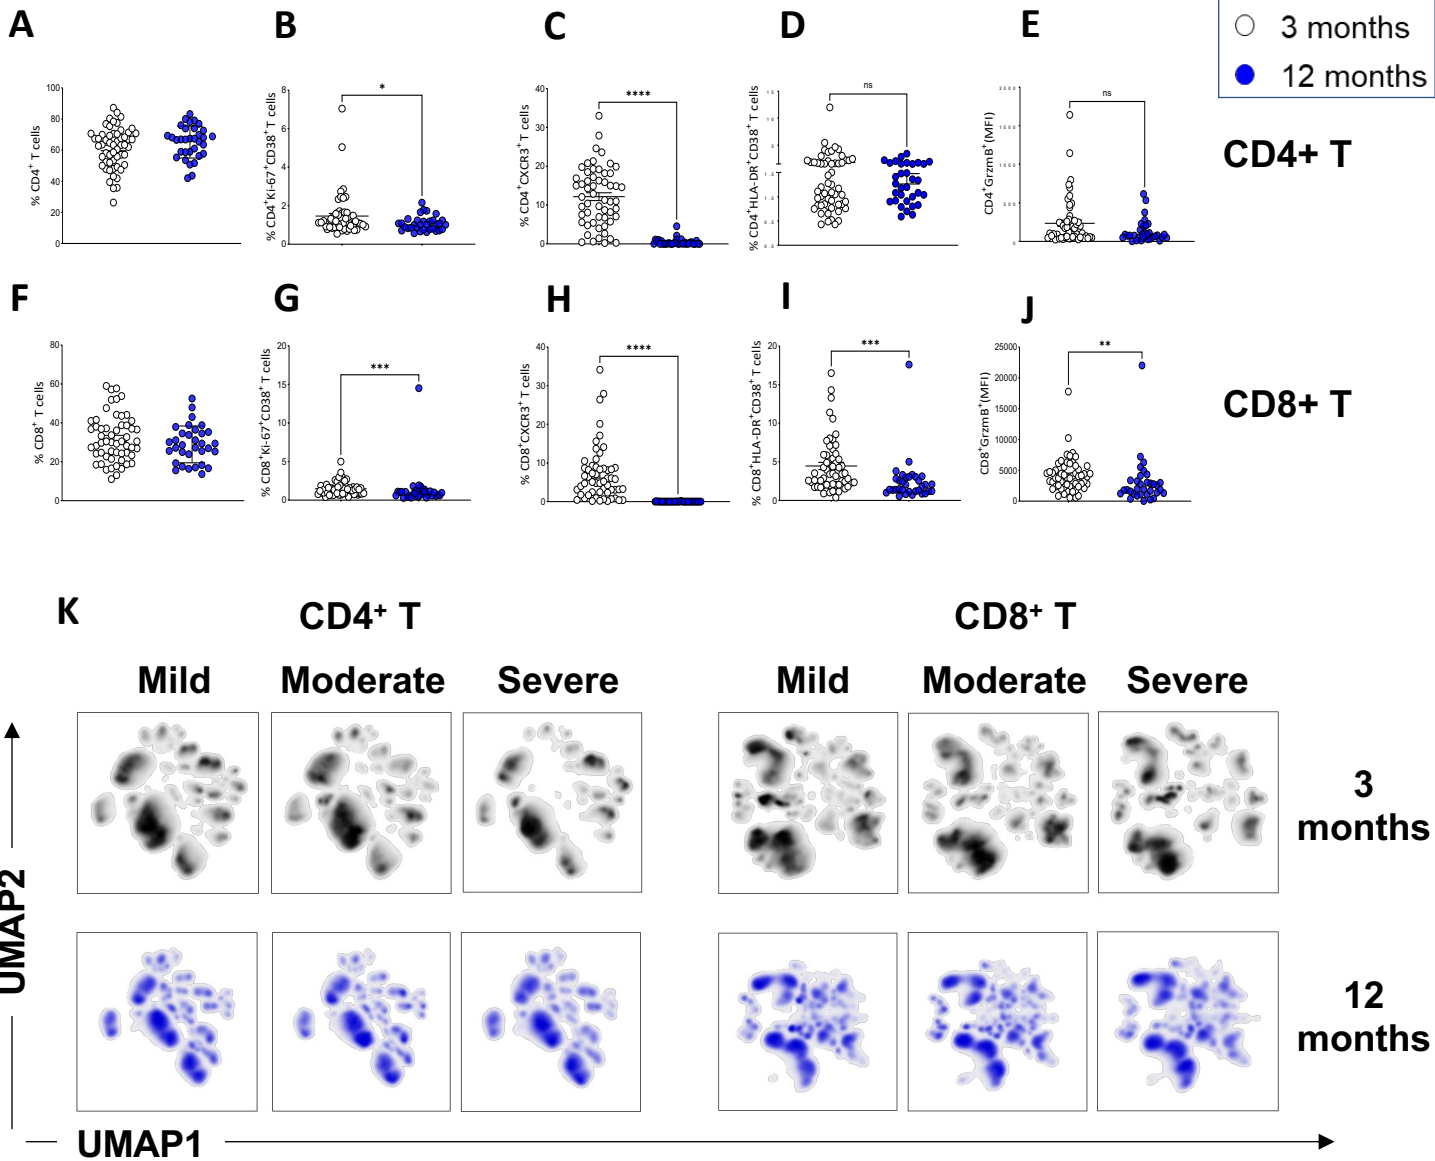

Supplement: supp [file elife_poa_e85009_Figure_2_figure_supplement_1.pdf › elife_poa_e85009_Figure_2_figure_supplement_1.pdf]

○ Mild    ● Moderate    ● Severe

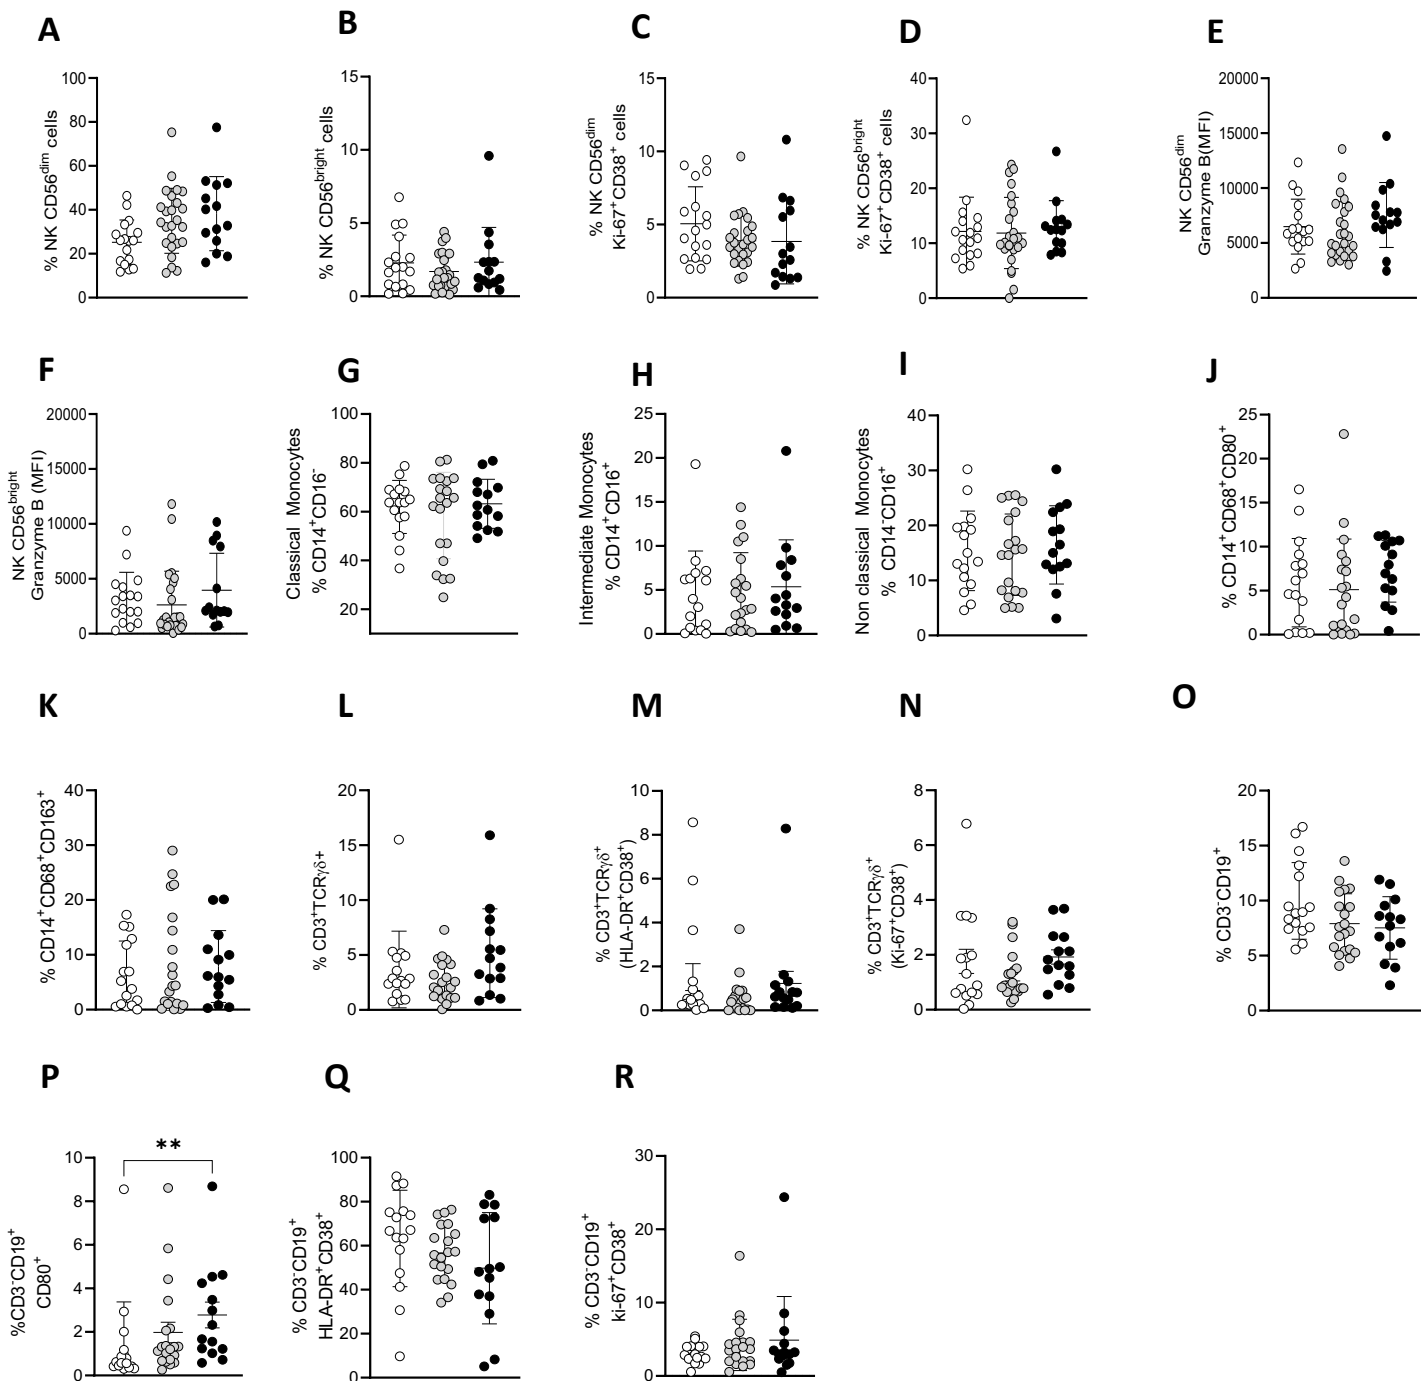

Figure 2- figure supplement 2

Supplement: supp [file elife_poa_e85009_Figure_2_figure_supplement_2.pdf › elife_poa_e85009_Figure_2_figure_supplement_2.pdf]

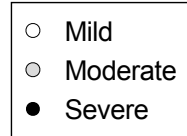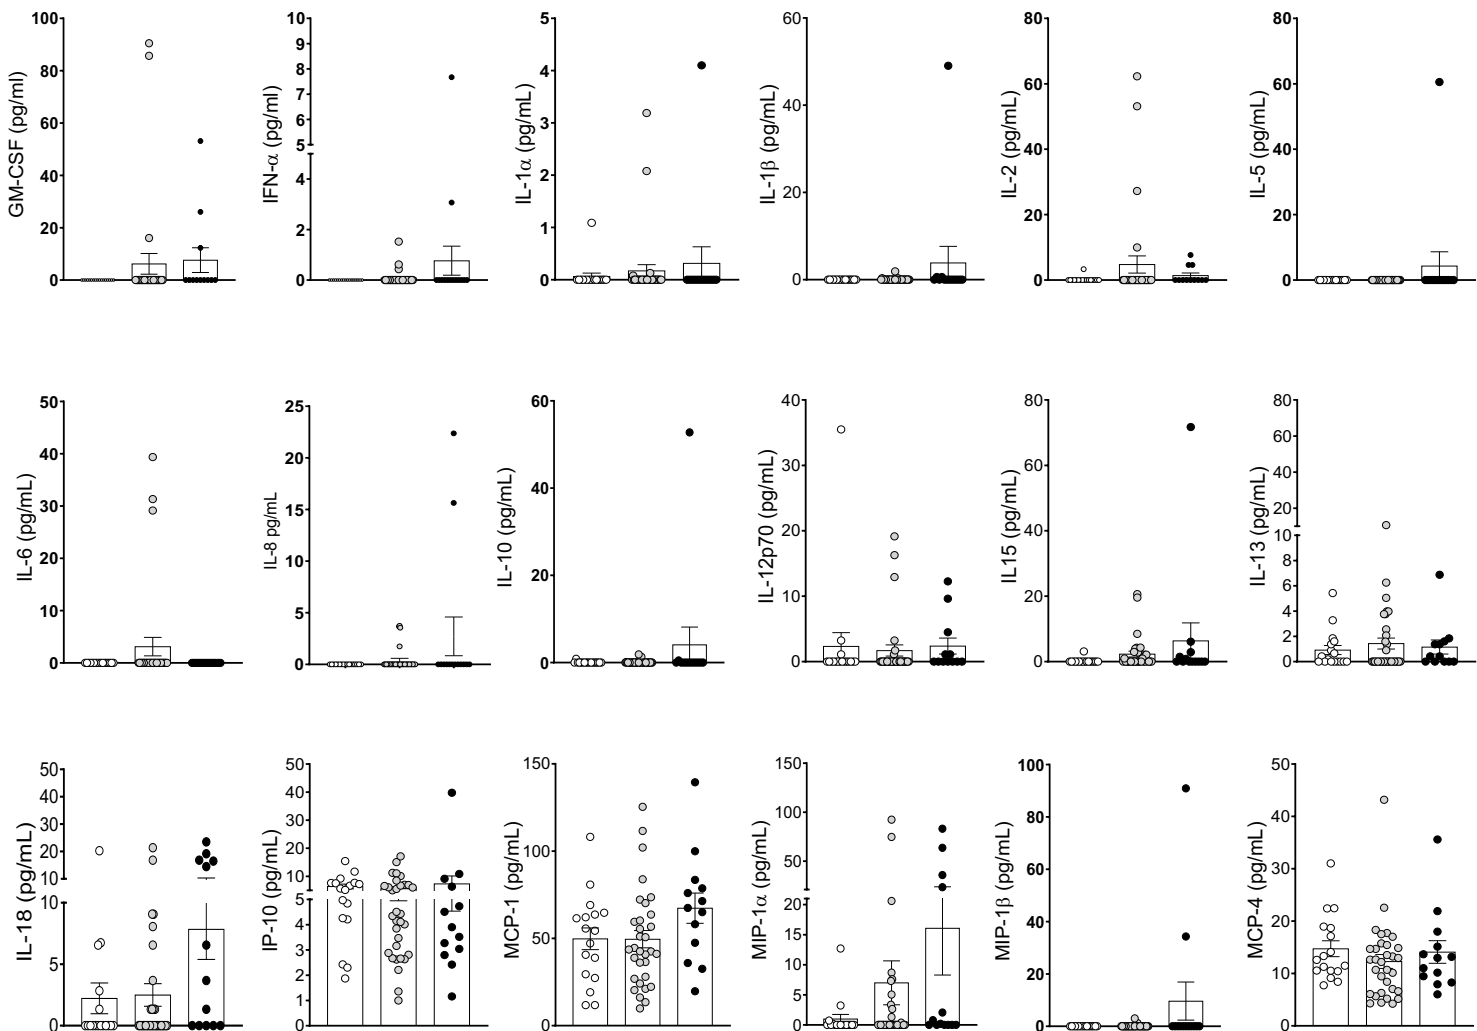

Figure 3- figure supplement 3

Supplement: supp [file elife_poa_e85009_Figure_3_figure_supplement_1.pdf › elife_poa_e85009_Figure_3_figure_supplement_1.pdf]
